# Supplementary material
Source: PubMed Central journal article supplement (PMC3066603)
Supplement: supp_51.10.5343_09-5028_Figure_S1.pdf [file supp_51.10.5343_09-5028_Figure_S1.pdf]

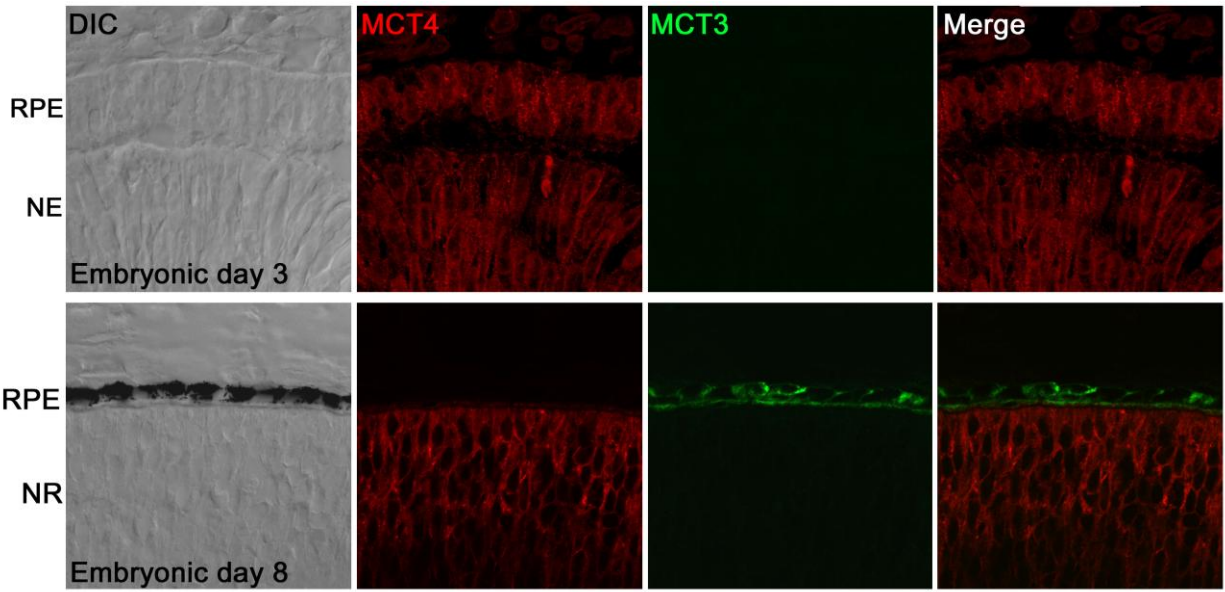

Supplementary Figure S1. Developmental expression of MCTs in the chick eye. Chick eyes were sectioned at embryonic day 3 and embryonic day 8 to examine MCT expression during development. MCT4 is detected in the primitive RPE and neuro-ectoderm (NE) at E3, while MCT3 expression is not detected. By E8, MCT4 expression is restricted to the neural retina (NR) and MCT3 expression is turned on in the differentiating RPE. DIC, differential image contrast.
